# Supplementary material for: The Phenolic compound Kaempferol overcomes 5-fluorouracil resistance in human resistant LS174 colon cancer cells
Source: PubMed Central journal article supplement (PMC6336835; doi:10.1038/s41598-018-36808-z), 2019-01-17
Supplement: 41598_2018_36808_MOESM1_ESM.pdf [file 41598_2018_36808_MOESM1_ESM.pdf]

# **The Phenolic compound Kaempferol overcomes 5-fluorouracil resistance in human resistant LS174 colon cancer cells**

Ichrak Riahi-Chebbi<sup>1,5</sup>, Soumaya Souid<sup>1,5§</sup>, Houcemeddine Othman<sup>2,5§</sup>, Meriam Haoues<sup>3,5</sup>, Habib Karoui<sup>1,5</sup>, Alain Morel<sup>4</sup>, Najet Srairi-Abid<sup>2,5</sup>, Makram Essafi<sup>3,5</sup> and Khadija Essafi-Benkhadir<sup>1,5\*</sup>

<sup>1</sup>Institut Pasteur de Tunis, LR11IPT04/LR16IPT04 Epidémiologie Moléculaire et Pathologie Expérimentale appliquée aux Maladies infectieuses, 1002, Tunis, Tunisia.

<sup>2</sup>Institut Pasteur de Tunis, LR11IPT08/LR16IPT08 Venins et Biomolécules thérapeutiques, 1002, Tunis, Tunisia.

<sup>3</sup>Institut Pasteur de Tunis, Laboratoire de Recherche sur la Transmission, le Contrôle et l'Immunobiologie des Infections, LR11 IPT02, 1002 Tunis, Tunisia.

<sup>4</sup>CRCINA, INSERM, université de Nantes, université d'Angers, Paul Papin ICO cancer center, Angers, France

<sup>5</sup>Université de Tunis El Manar, 1068, Tunis, Tunisia.

§ These authors contribute equally to this work.

\*Corresponding author: Essafi-Benkhadir Khadija, Laboratoire d'Epidémiologie Moléculaire et de Pathologie Expérimentale Appliquée Aux Maladies Infectieuses (LR11IPT04/LR16IPT04), Institut Pasteur de Tunis, 13 Place Pasteur BP 74, 1002 Tunis. Belvédère, Tunisia. E-mail: [essafi.khadija@pasteur.rns.tn](mailto:essafi.khadija@pasteur.rns.tn) Tel: (+216)71783022, ext: 592 Fax: (+216)71791833.

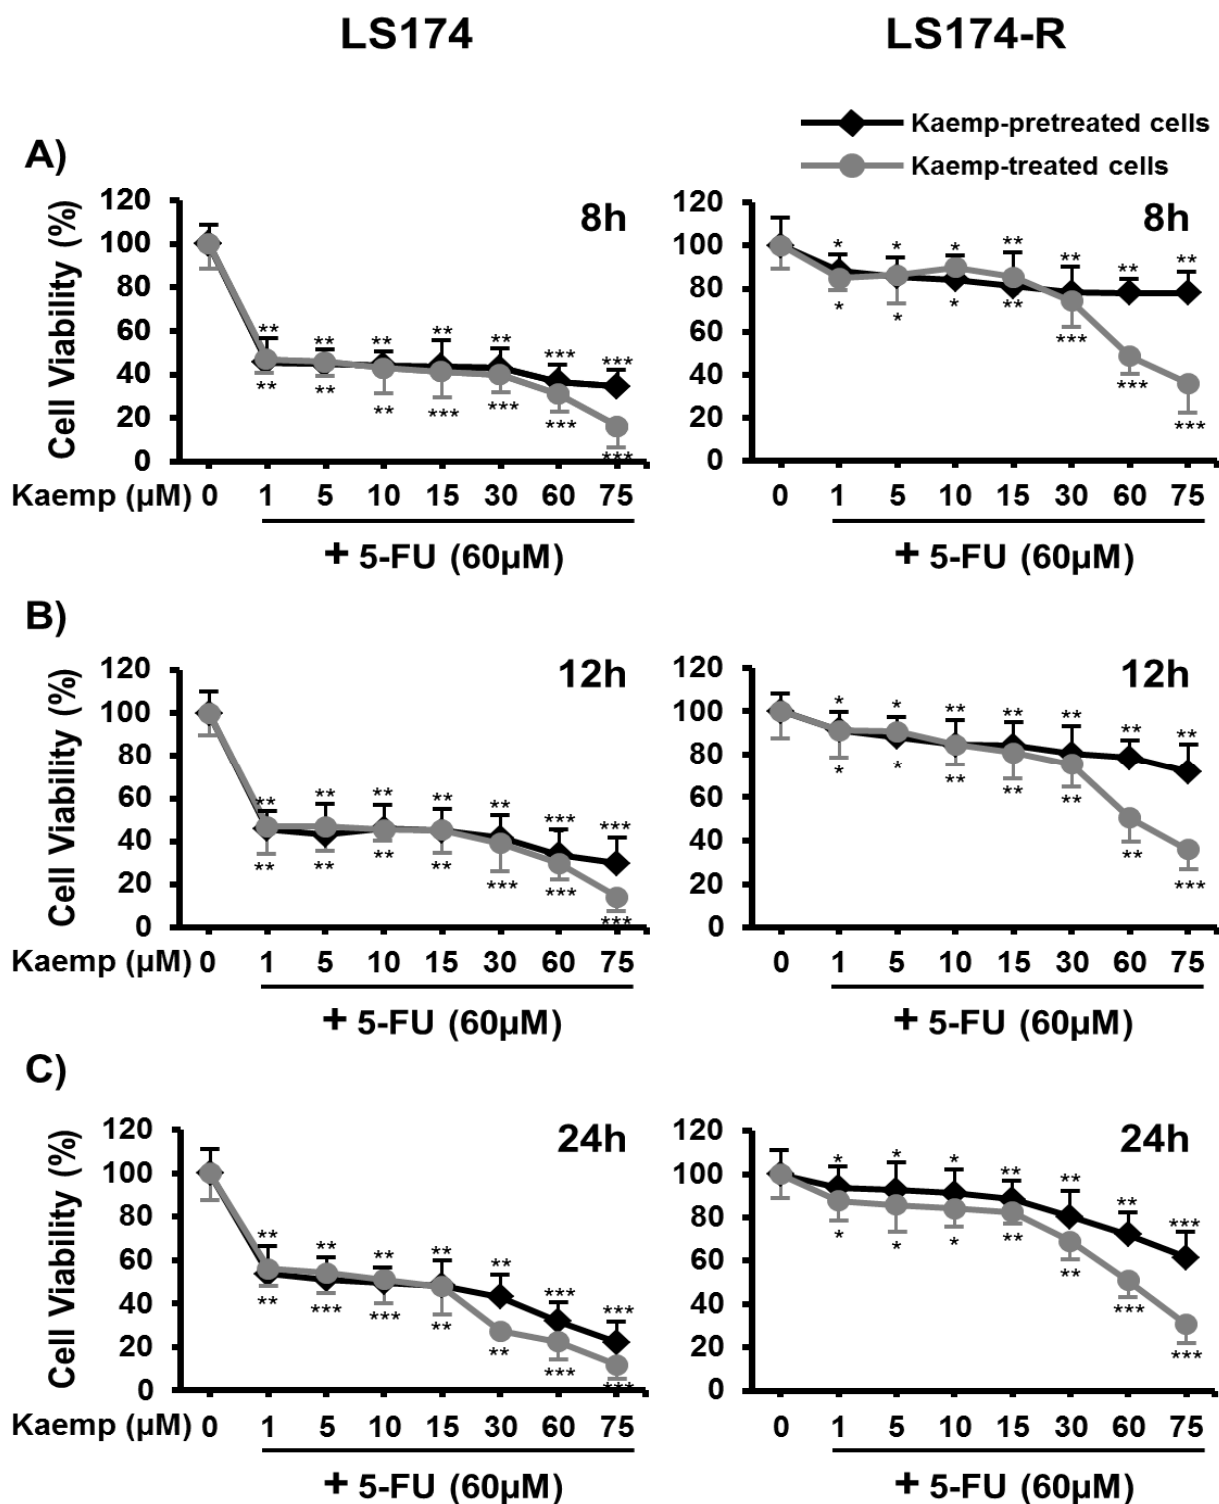

**Fig. S1. Kaempferol pretreatment chemo-sensitizes resistant colon cancer cells to 5-FU chemotherapy.** Both parental LS174 cells and 5-FU-resistant LS174-R cells were seeded in 96-well plates and pretreated for different time **A)** 8 h, **B)** 12 h and **C)** 24 h with increasing concentrations of Kaempferol (1-75 μM) and then exposed to 60 μM of 5-FU after removing or preserving the phenolic compound in the culture medium for additional 72 h. Cell viability was measured by MTT assay. The absorbance was measured at 540 nm. \*p < 0.05, \*\*p < 0.01 and \*\*\*p < 0.005 when compared to their respective CN.

A)

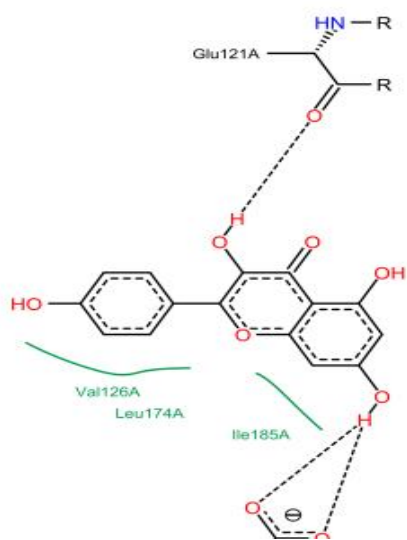

B)

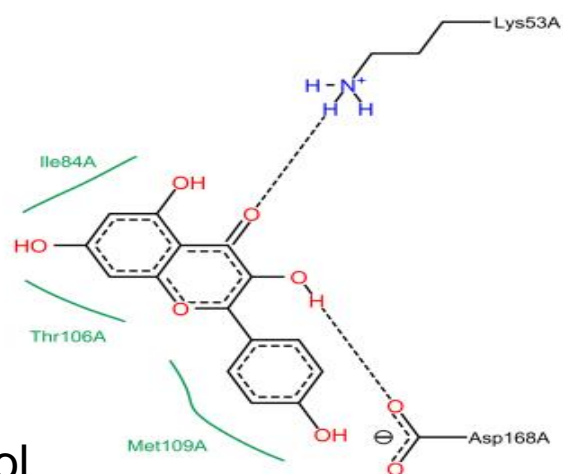

Kaempferol

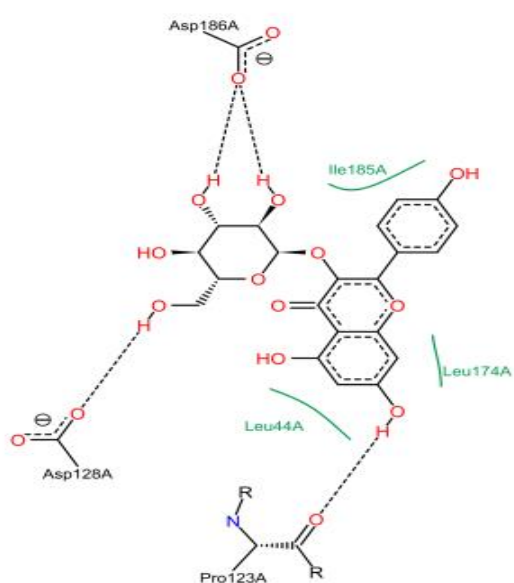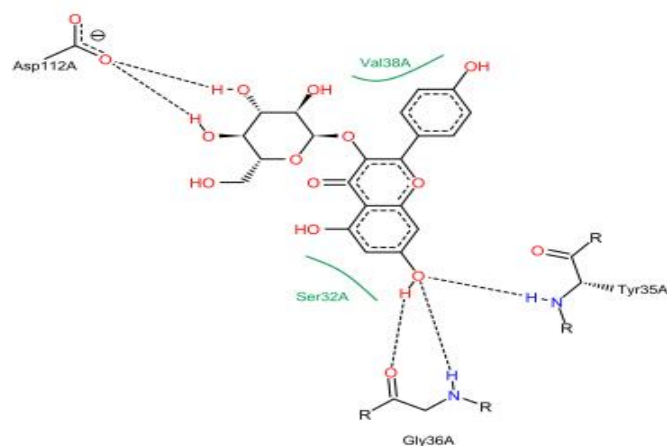

Kaempferol 3-O-glucoside

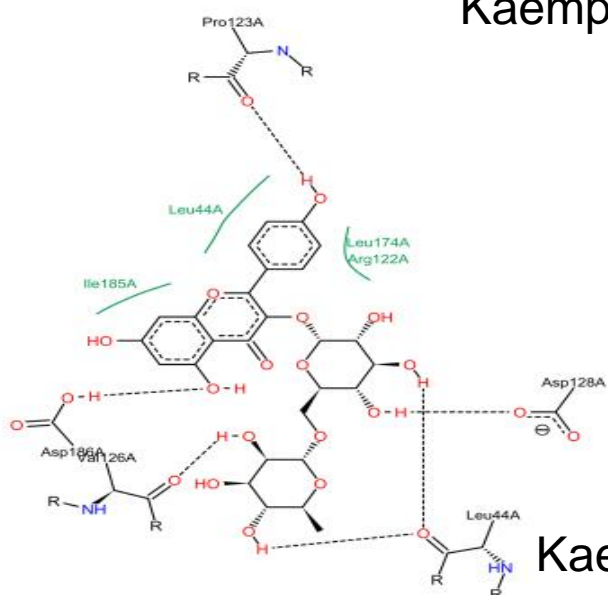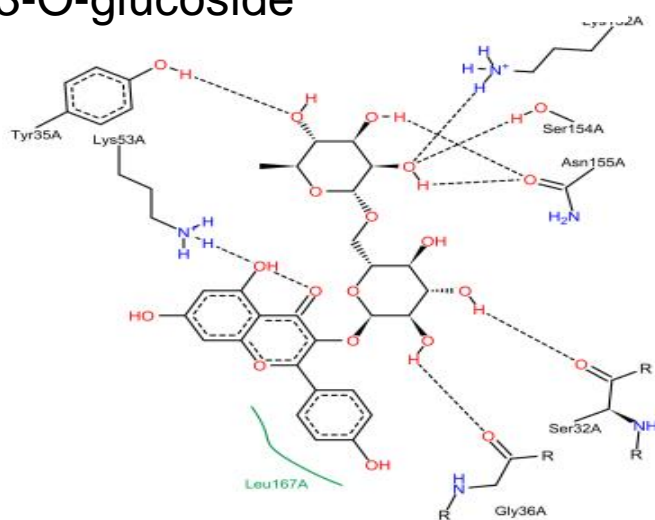

Kaempferol 3-O-rutinoside

**Fig.S2.** Description of the interactions established by Kaempferol, Kaempferol 3-O-glucoside and Kaempferol 3-O-rutinoside with PMI1 (A) and p38 (B). The figure was generated using PoseView (Stierand and Rarey, 2010, doi: 10.1021/ml100164p)
